# Supplementary material for: PAX4 loss of function increases diabetes risk by altering human pancreatic endocrine cell development
Source: PubMed Central journal article supplement (PMC10542369; doi:10.1038/s41467-023-41860-z), 2023-09-30
Supplement: 41467_2023_41860_MOESM1_ESM.pdf [file 41467_2023_41860_MOESM1_ESM.pdf]

PAX4 loss of function increases diabetes risk by altering human pancreatic endocrine cell development

Supplementary Information

### Supplementary Fig. 1

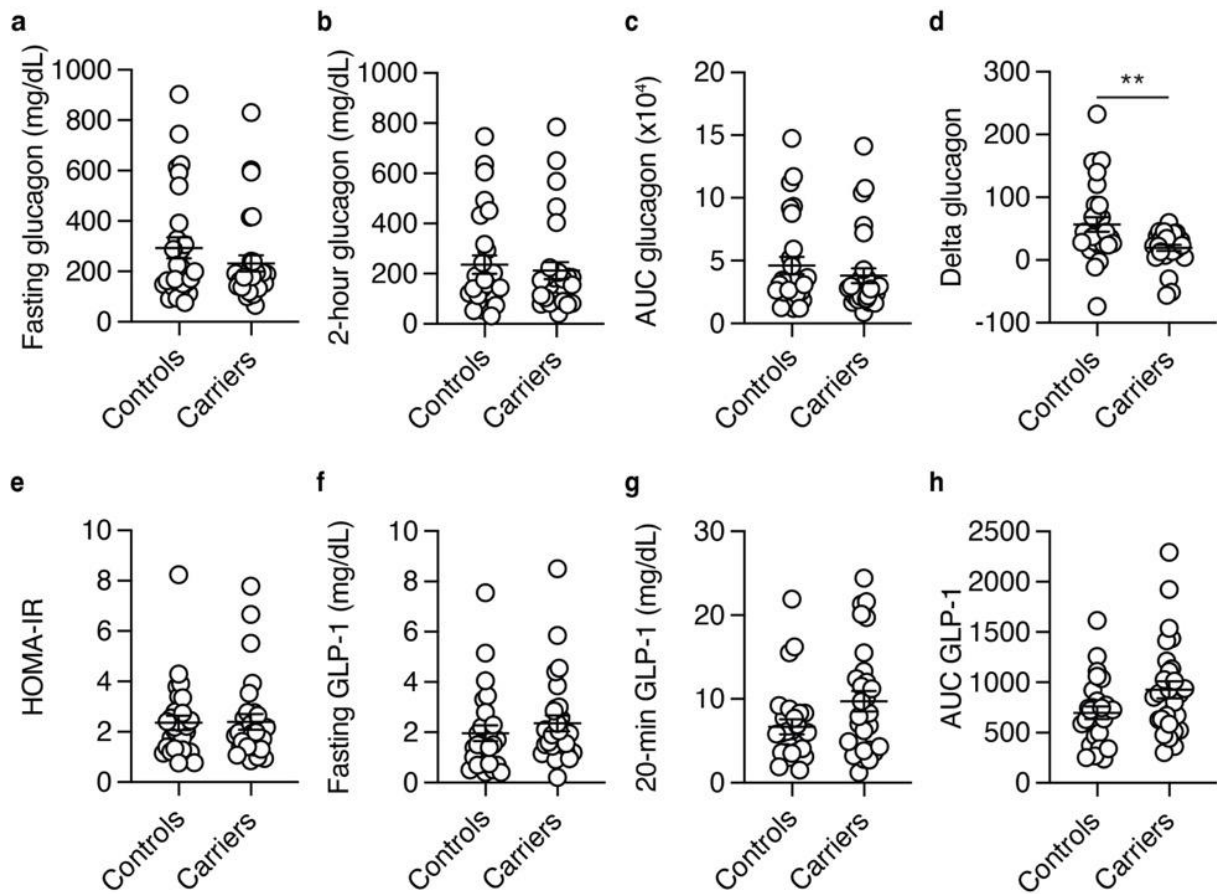

### Supplementary Fig. 1 | Clinical assessment of glucagon, HOMA-IR, and GLP-1 in subjects carrying the p.Arg192His *PAX4* variant.

(a-d) Plasma glucagon level (mg/dL) at (a) fasting, (b) 2-hour time point, (c) area under the curve (AUC), and (d) delta glucagon during oral glucose tolerance test of subjects carrying the p.His192 allele (n=29) and p.Arg192Arg controls (n=28). (e) HOMA-IR measurement of p.Arg192Arg controls and p.His192 carriers during the 2-hour oral glucose tolerance test. (f) Fasting, (g) 20-min, and (h) AUC GLP-1 measurements during oral glucose tolerance test. Data are presented as mean±SEM. Statistical analyses were performed using two tailed unpaired Student's t-test. \*p<0.05, \*\*p<0.01. Source data is provided in the Source Data File.

## Supplementary Fig. 2

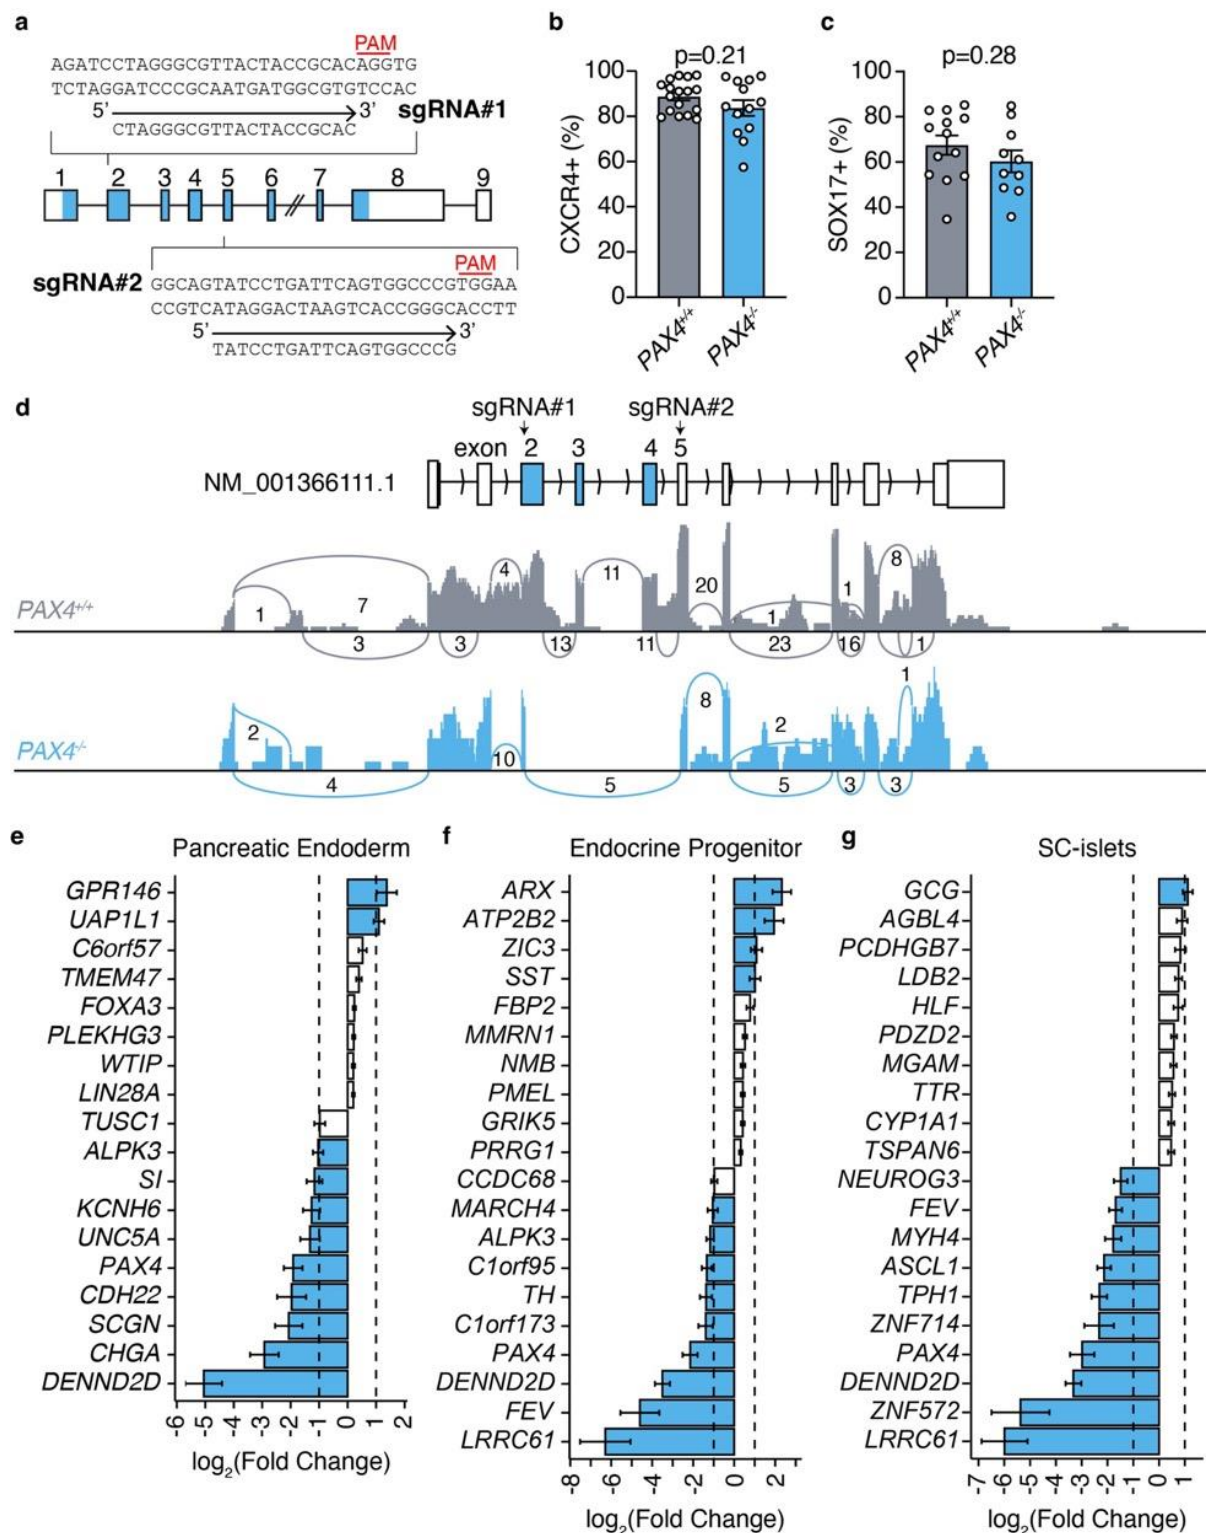

**Supplementary Fig. 2 | Validation of  $PAX4^{KO/KO}$  human induced pluripotent stem cells.** (a) CRISPR-Cas9 genome editing strategy to generate  $PAX4^{KO/KO}$  hiPSC line. Two sgRNAs were designed to target exon 2 (sgRNA#1) and exon 5 (sgRNA#2). PAM genomic sequence is highlighted in red. (b-c) Flow cytometry analyses of definitive endoderm markers (b) CXCR4 (n=4) and (c) SOX17 of wildtype ( $PAX4^{WT/WT}$ ) and  $PAX4$ -knockout ( $PAX4^{KO/KO}$ ) DE cells (n=10). (d) Sashimi plot of  $PAX4$  transcript from

Protocol A confirmed the loss of exons 2 through 5 in *PAX4*<sup>KO/KO</sup> lines. **(e-g)** Log<sub>2</sub>(Fold Change) expression of top differentially expressed genes that are expressed in **(e)** pancreatic endoderm, **(f)** endocrine progenitor, and **(g)** SC-islet stages. Blue bars represent genes with a log<sub>2</sub>(Fold Change) >1 or <-1. Each data point represents one independent experiment performed. Statistical analyses were performed by Student's t-test. Differentiation protocol A was used to derive data in Supplementary Fig. 2. Source data is provided in the Source Data File.

### Supplementary Fig. 3

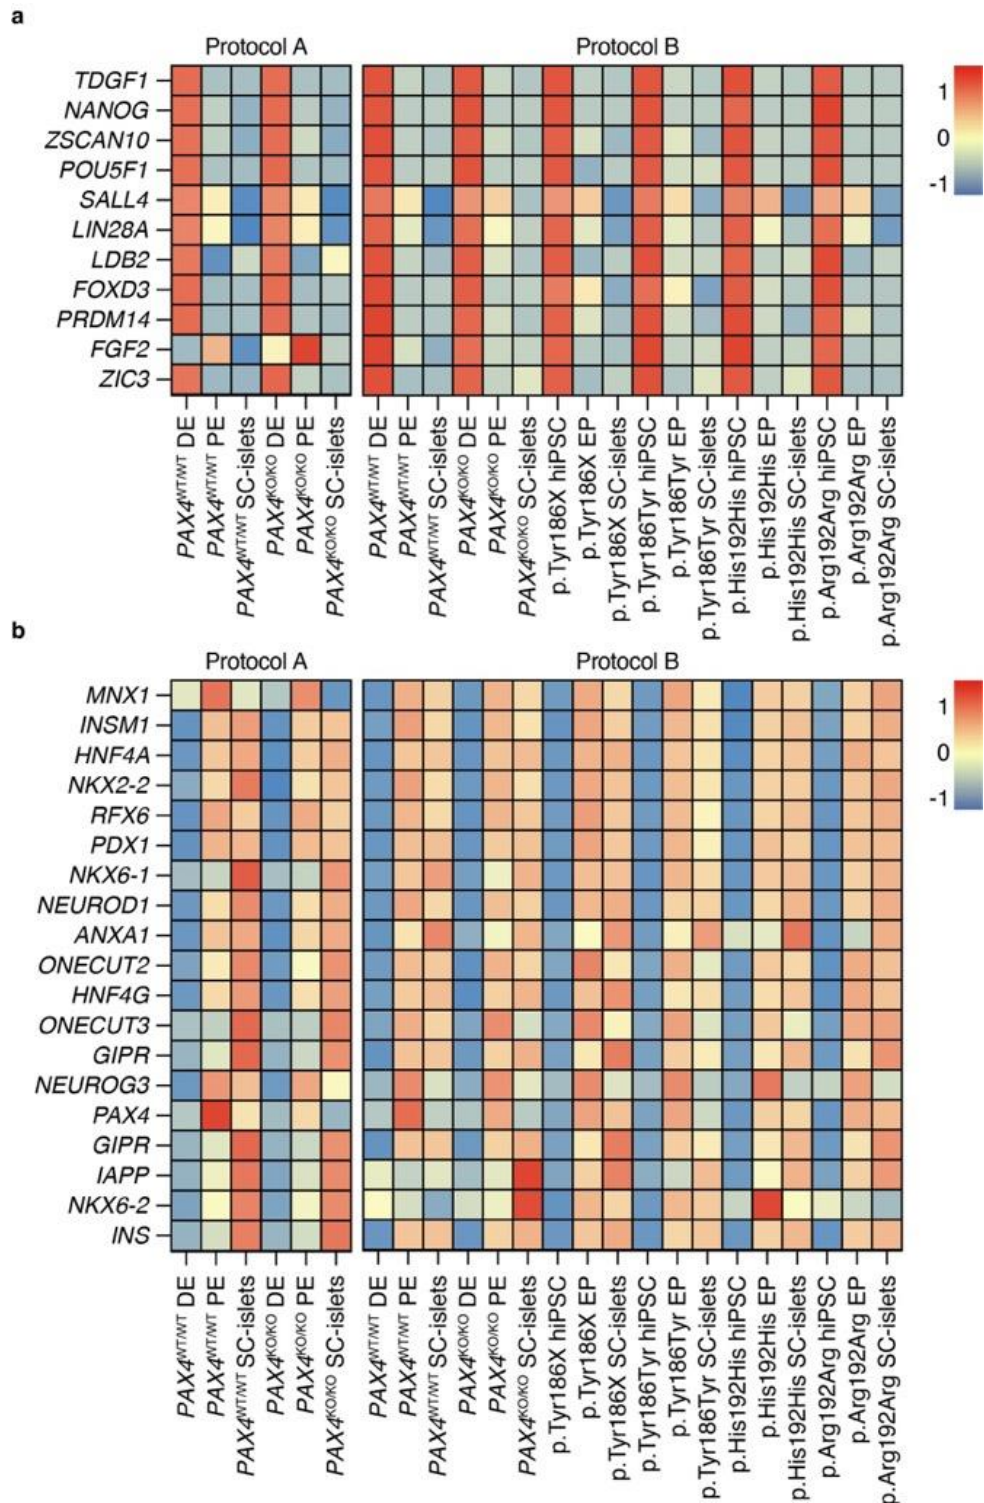

**Supplementary Fig. 3 | *PAX4*<sup>KO/KO</sup> and variant lines have similar repression of pluripotency and activation of endocrine markers as wildtype and corrected lines. (a) Key pluripotency and (b) endocrine progenitor gene expression in hiPSCs, DE cells, EPs, and SC-islets differentiated using Protocols A and B of *PAX4* wildtype (*PAX4*<sup>WT/WT</sup>), knockout (*PAX4*<sup>KO/KO</sup>), *PAX4* variants (p.His192His and p.Tyr186X), and corrected (p.Arg192Arg and p.Tyr186Tyr) donor-derived hiPSC lines.**



## Supplementary Fig. 4

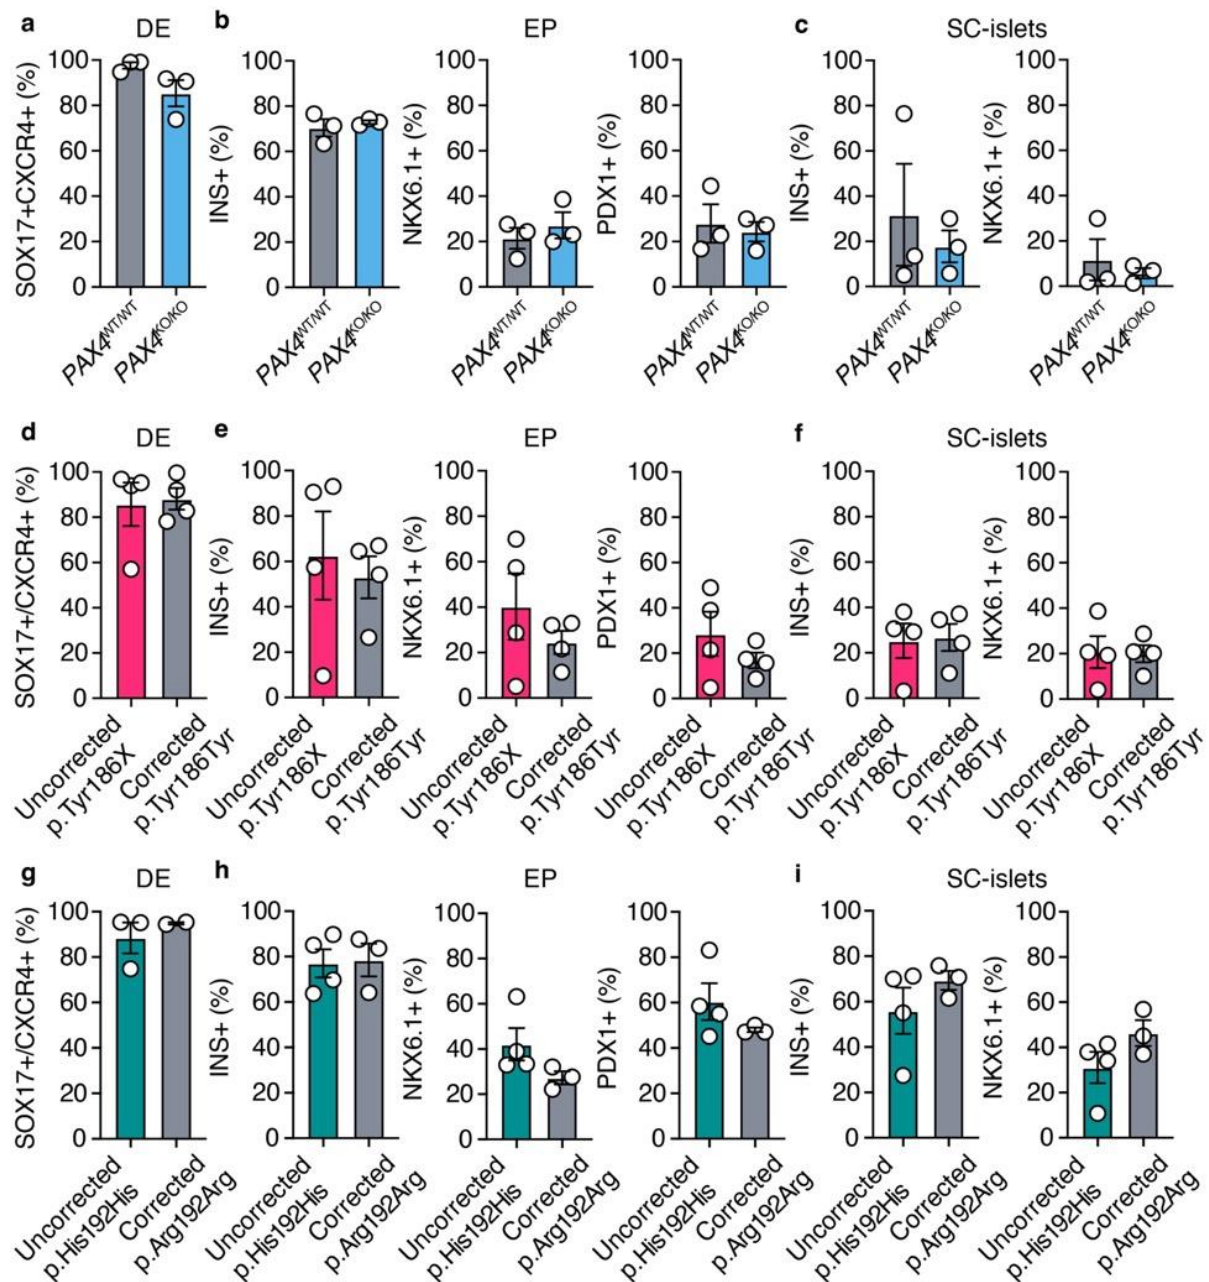

**Supplementary Fig. 4 | Flow cytometry characterization of differentiation protocol B.** Flow cytometry analyses of (a) definitive endoderm (DE) markers SOX17 and CXCR4; (b) endocrine progenitor (EP) markers INS, NKX6.1 and PDX1; and (c) islet-like cell (SC-islet) markers INS and NKX6.1 of wildtype ( $PAX4^{WT/WT}$ ) and  $PAX4$ -knockout ( $PAX4^{KO/KO}$ ) cells. Flow cytometry analyses of (d) DE markers SOX17 and CXCR4; (e) EP markers INS, NKX6.1 and PDX1; and (f) beta cell markers INS and NKX6.1 of p.Tyr186X and corrected p.Tyr186Tyr donor-derived hiPSC lines. Flow cytometry analyses of (g) DE markers SOX17 and CXCR4; (h) EP markers INS, NKX6.1 and PDX1; and (i) beta cell markers INS and NKX6.1 of p.His192His and corrected p.Arg192Arg donor-derived hiPSC lines. Each data point represents one biological independent cell line from one differentiation experiment. Data are presented as mean $\pm$ SEM. Differentiation protocol B was used to derive data in Supplementary Fig. 4. Source data is provided in the Source Data File.

## Supplementary Fig. 5

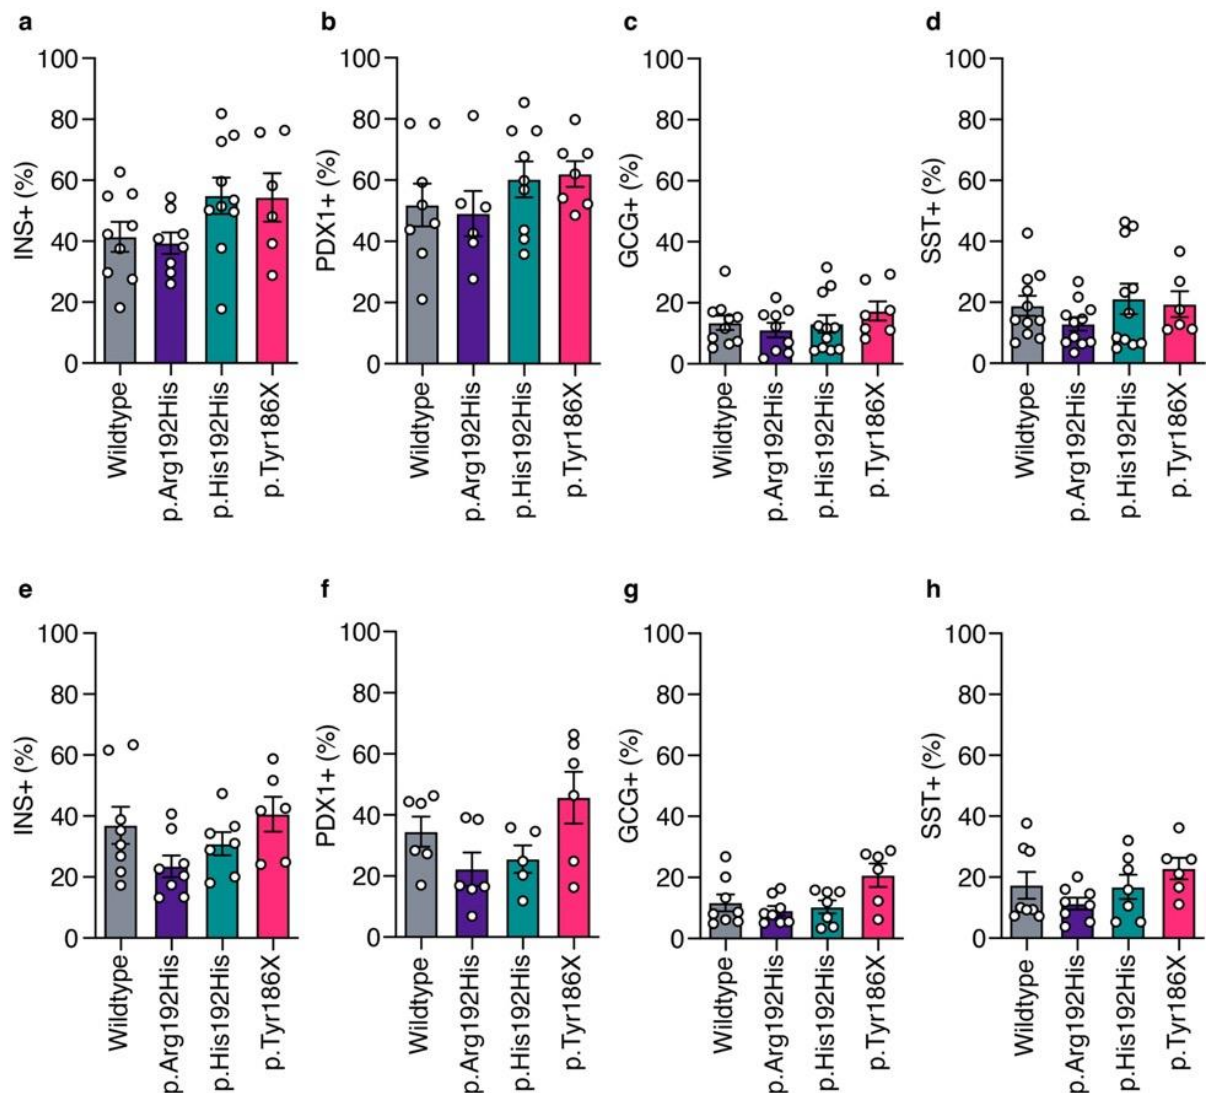

**Supplementary Fig. 5 | Flow cytometry analyses on key pancreatic endocrine cell development markers to characterize endocrine progenitors and beta-like cells differentiated from donor-derived hiPSC lines.** hiPSC lines derived from two wildtype, two p.Arg192His, two p.His192His and one p.Tyr186X donors were subjected to differentiation. Percentage of cells stained positive for INS, PDX1, GCG and SST on (a-d) D20 endocrine progenitor (EP) stage and (e-h) D35 islet-like cell (SC-islet) stage are presented as mean±SEM. n=5 differentiation experiments were performed. Statistical analyses were performed using one-way ANOVA. Differentiation protocol B was used to derive data in Supplementary Fig. 5. Source data is provided in the Source Data File.

## Supplementary Fig. 6

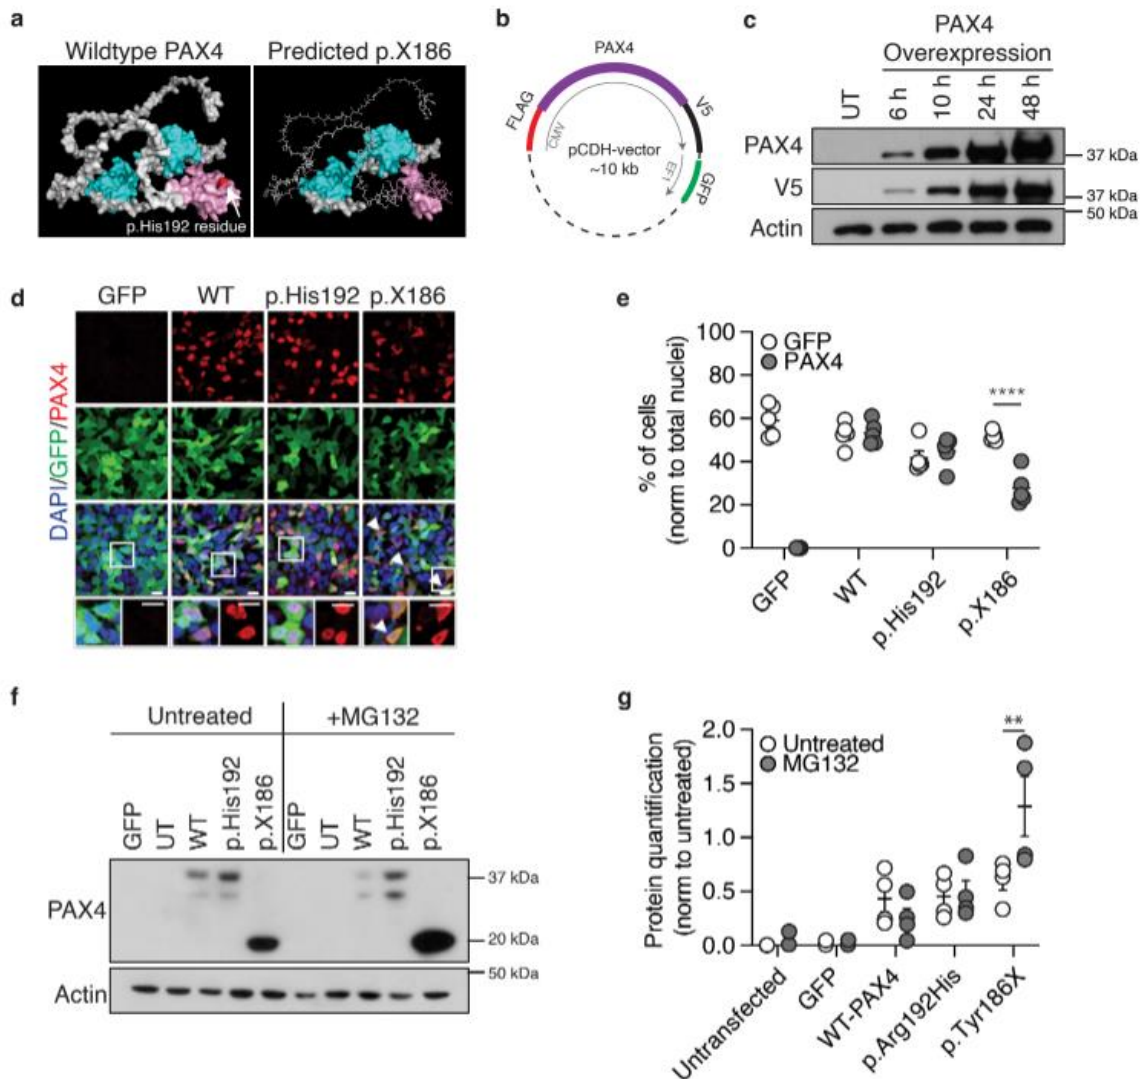

### Supplementary Fig. 6 | Characterization of PAX4 and its variant proteins.

(a) Predicted PAX4 protein structure obtained from AlphaFold (AF-O43316-F1-model\_v2). PyMOL was used for molecular visualization. Using wildtype PAX4 as template, p.X186 protein was extrapolated to demonstrate protein truncation. (b) Construct design for PAX4 overexpression studies. (c) Western blot assessment of PAX4 protein, V5 tag (~37 kD) and ACTIN loading control in AD293 cells transfected with pCDH-WT-PAX4 plasmid for 6, 10, 24 and 48 hours compared to untransfected (UT) control (n=1). (d) Representative immunofluorescent images of PAX4 (red, anti-PAX4 antibody), GFP (green), and nuclei (DAPI; blue) in AD293 cells following transfection of WT PAX4, p.His192, or p.X186 expressing plasmids from one experiment. Scale bar = 10  $\mu$ m. (e) Quantification of GFP- and PAX4-expressing cells from immunofluorescence in (d). Percentage of cells expressing PAX4 or GFP was normalized to the total number of nuclei (DAPI). Statistical analyses were performed using two-way ANOVA and Sidak's multiple comparisons test, \*\*\*\*p<0.0001. (f) Representative image of western blot assessment and (g) densitometry quantification for WT PAX4, p.His192 and p.X186 was overexpressed in AD293 cells and normalized to ACTIN loading control. Cells were treated with or without 10  $\mu$ M of MG132 for 24 hours posttransfection. Molecular weights of 37 kD and 20 kD correspond to WT PAX4



and p.X186 truncated protein, respectively. Anti-PAX4 antibody was used. n = 4. Statistical analyses were performed using two-way ANOVA and Sidak's multiple comparisons test, \*\*p<0.01. Source data is provided in the Source Data File.

## Supplementary Fig. 7

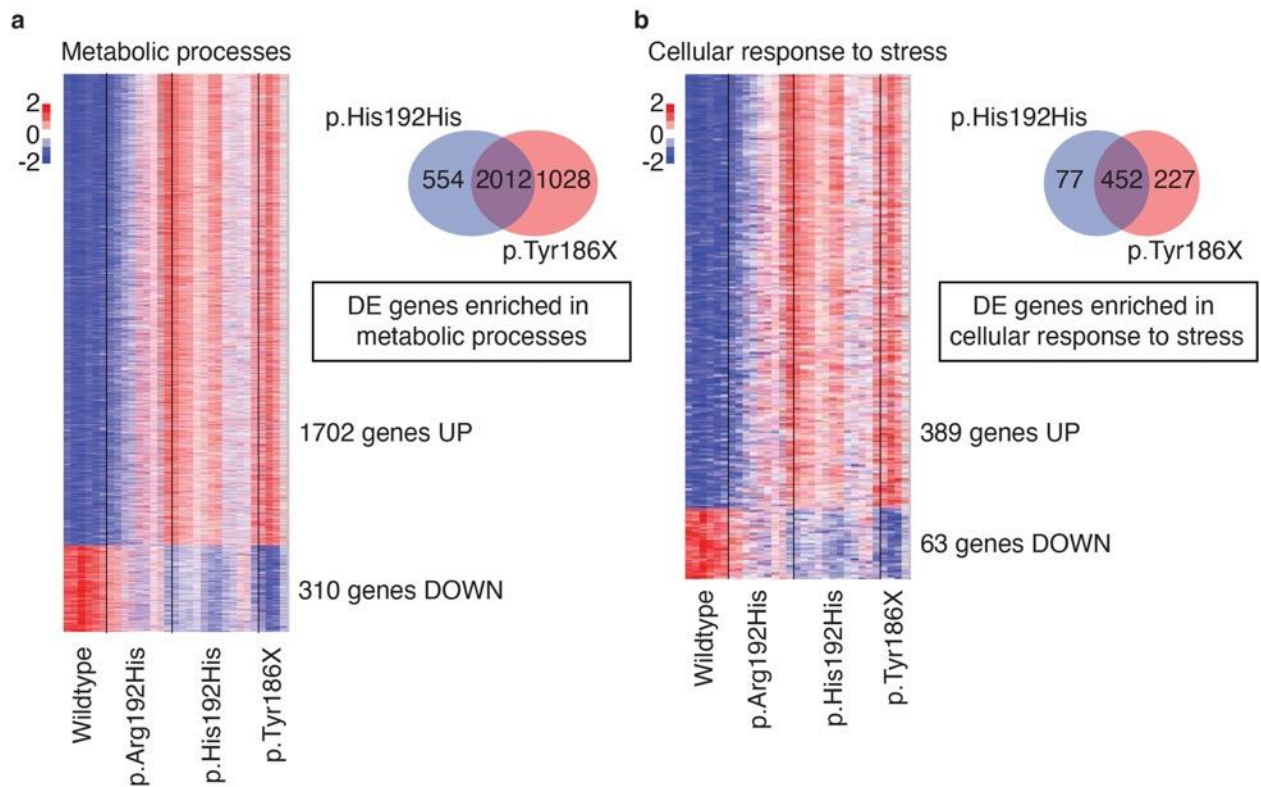

**Supplementary Fig. 7 | RNA-seq revealed elevated metabolic stress in endocrine progenitors derived from donor-derived hiPSCs carrying *PAX4* variants.** Targeted heatmap of differentially expressed genes in endocrine progenitors that are involved in (a) metabolic processes (total gene count: 2012; upregulated: 1702; downregulated: 310) and (b) cellular response to stress (total gene count: 452; upregulated: 389; downregulated: 63). Venn diagram illustrating differentially expressed (DE) genes enriched in GO terms (a) metabolic processes or (b) biological processes when comparing p.His192His or p.Tyr186X against *PAX4*<sup>WT/WT</sup> with FC < 0.5 or FC > 2. Differentiation protocol B was used to derive data in Supplementary Fig. 7.

### Supplementary Fig. 8

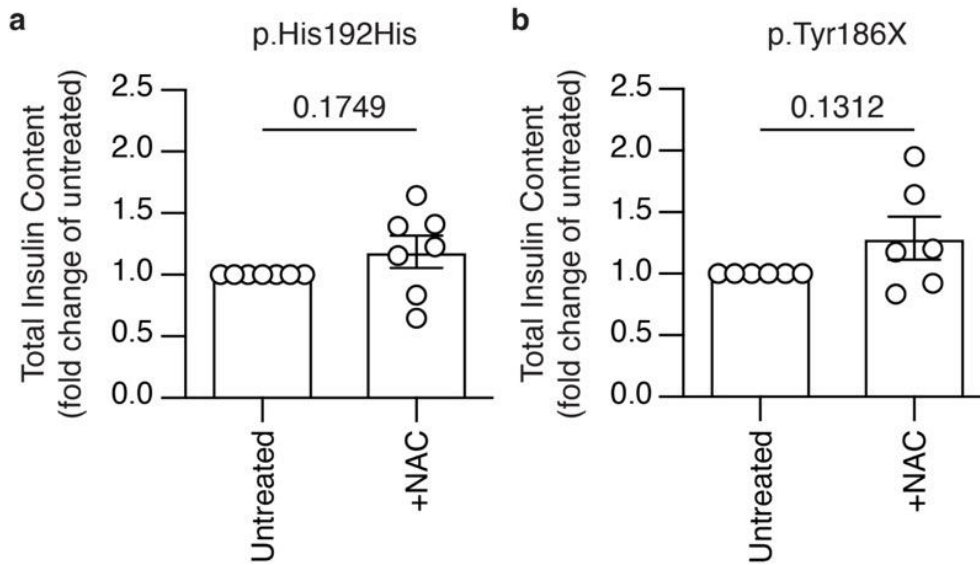

**Supplementary Fig. 8 | Antioxidant treatment does not rescue the total insulin content in compromised SC-islets.** Total insulin content of SC-islets treated with 10  $\mu$ M antioxidant NAC from EP to SC-islet stage carrying (a) p.His192His or (b) p.Tyr186X. Each dot represents an average of technical replicates of one hiPSC line from one experiment.  $n=4$ . Data are presented as mean $\pm$ SEM. Statistical analyses were performed by two-tailed Student's t-test,  $*p<0.05$ . Differentiation protocol B was used to derive data in Supplementary Fig. 8. Source data is provided in the Source Data File.

## Supplementary Fig. 9

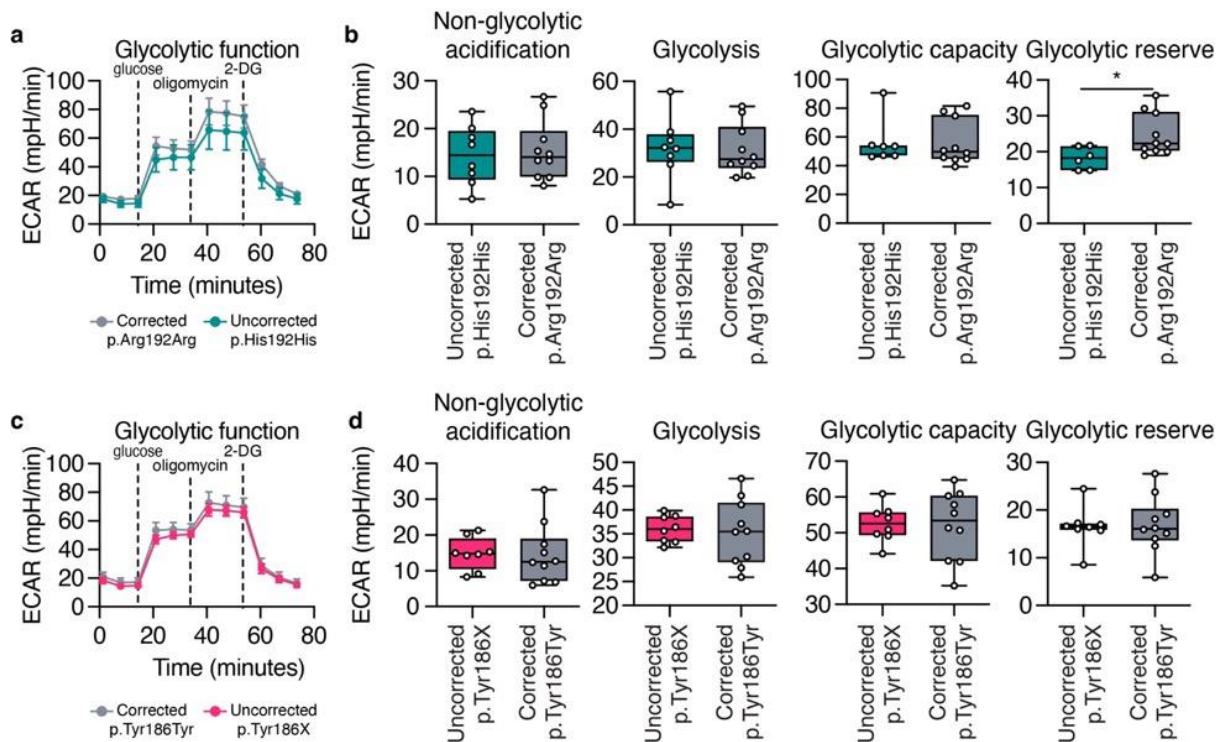

**Supplementary Fig. 9 | Metabolic stress is not the main causative factor for compromised SC-islets.** Glycolysis stress test on hiPSC-derived EP cells generated using protocol B. Extracellular acidification rate (ECAR) profiles of EP cells of (a-b) p.Arg192Arg (corrected) against p.His192His (uncorrected) and (c-d) p.Tyr186Tyr (corrected) against p.Tyr186X (uncorrected). Each data point represents the average measurement rate of technical replicates from one cell line. n=4 differentiation experiments were performed. Box and whisker plots illustrating median (centre), quartiles (25th and 75th percentile), maximum and minimum of all data points. Statistical analyses were performed by two-tailed Student's t-test, \*p<0.05. Differentiation protocol B was used to derive data in Supplementary Fig. 9. Source data is provided in the Source Data File.



Supplementary Fig. 10

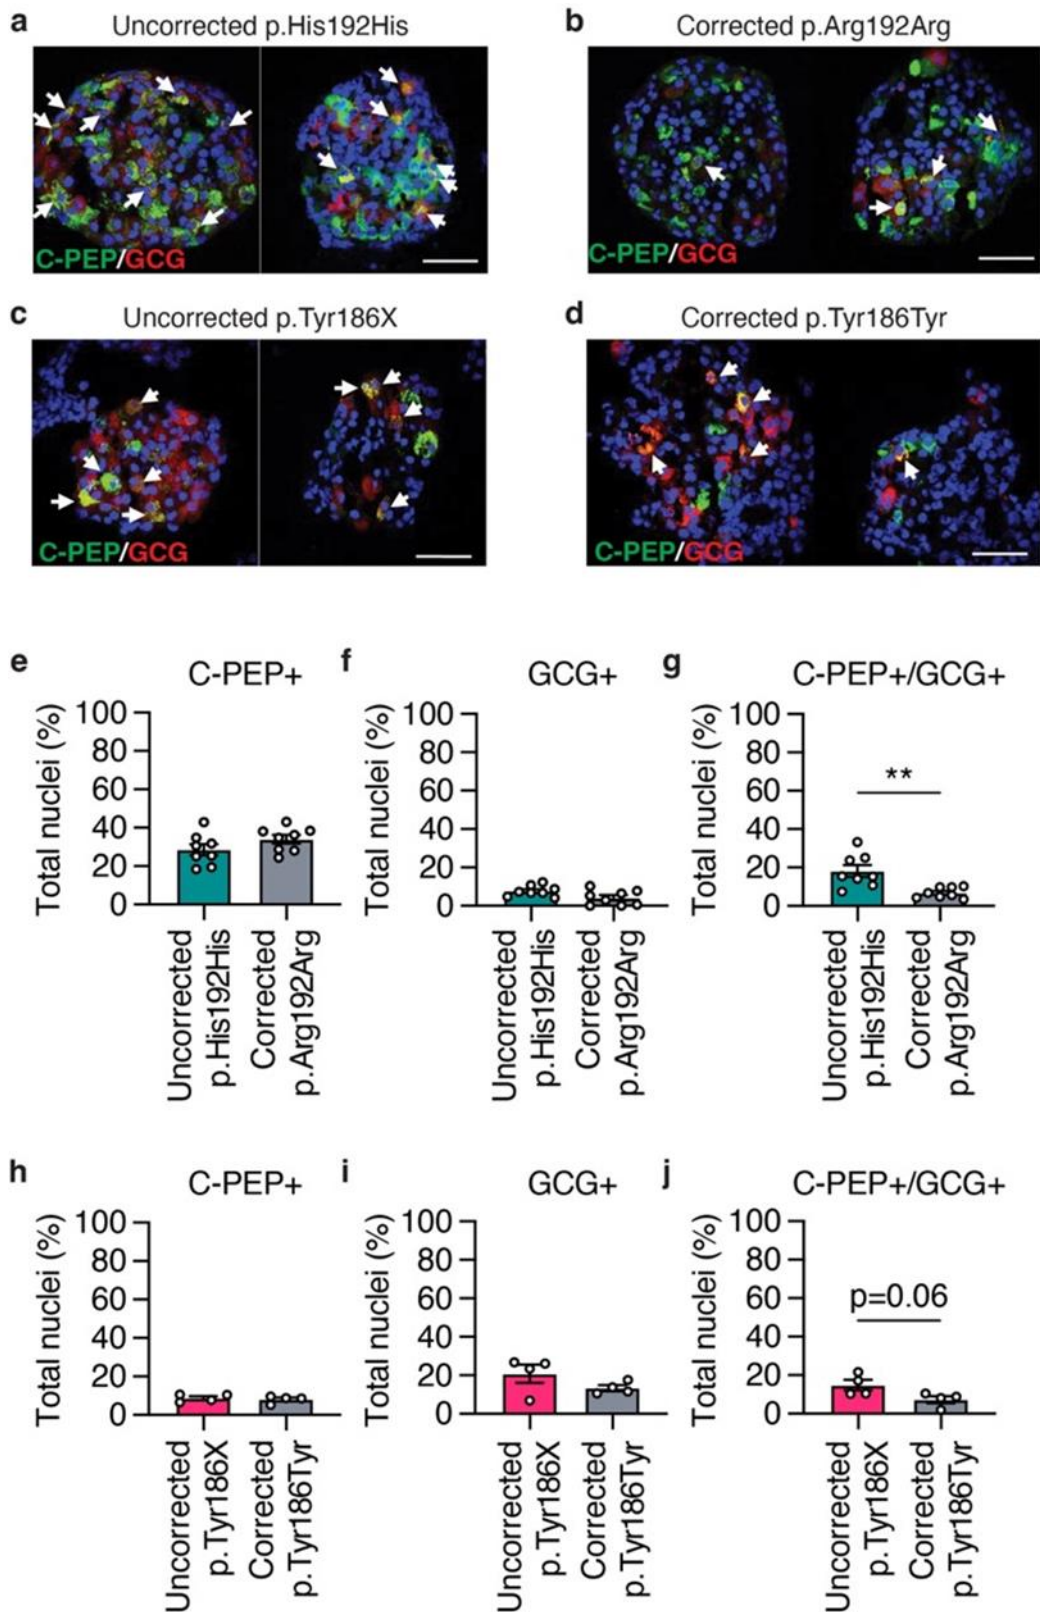

**Supplementary Fig. 10 | CRISPR-correction of p.His192His or p.Tyr186X allele(s) decreased the number of polyhormonal islet-like cells.** Representative immunofluorescence images of hiPSC-derived beta-like cells with C-peptide in red, glucagon in green, and nuclei in blue, (a) uncorrected p.His192His; (b) corrected

p.Arg192Arg; **(c)** uncorrected p.Tyr186X; and **(d)** corrected p.Tyr186Tyr. Arrows indicate C-PEP+/GCG+ double-positive cells. Scale bar: 50  $\mu$ m. Quantification of immunofluorescence images for the percentage of cells expressing C-PEP (monohormonal), GCG (monohormonal) or C-PEP+/GCG+ (polyhormonal) in **(e-g)** uncorrected p.His192His, corrected p.Arg192Arg, **(h-j)** uncorrected p.Tyr186X; and corrected p.Tyr186Tyr islet-like cells. Differentiation protocol B was used to derive data in Supplementary Fig. 10. Data are presented as mean $\pm$ SEM. All data were from one differentiation experiment. Each data point represents cell count data from one independent SC-islet. Four biological independent cell lines were used in fig. a, b, e-g. Two biological independent cell lines were used in fig. b, d, h-j. Statistical analyses were performed by two-tailed Student's t-test, \*\* $p < 0.01$ . Source data is provided in the Source Data File.

## Supplementary Fig. 11

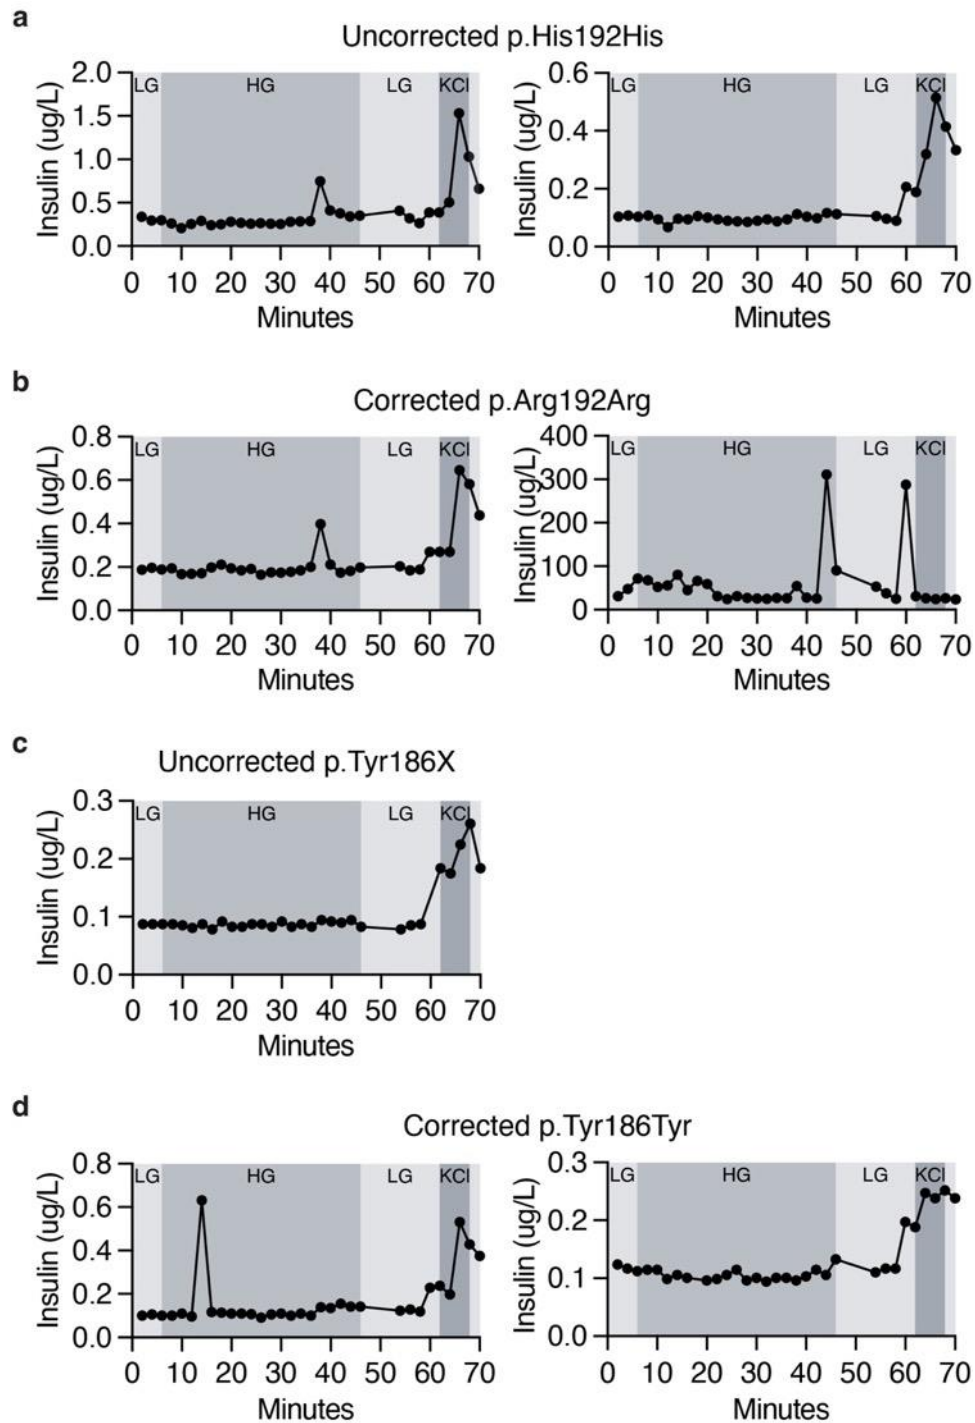

**Supplementary Fig. 11 | Dynamic glucose-stimulated insulin secretion performed on beta-like cells.** Donor hiPSC-derived SC-islets carrying (a) uncorrected p.His192His (two lines); (b) corrected p.Arg192Arg (two lines); (c) uncorrected p.Tyr186X (one line); and (d) corrected p.Tyr186Tyr (one line) were stimulated at 2.8 mM (6 min), 16.7 mM (40 min), 2.8 mM (16 min) and 30 mM KCL (6 min) sequentially. Each graph represents data obtained from one hiPSC line. Differentiation protocol B was used to derive data in Supplementary Fig. 11. Source data is provided in the Source Data File.

## Supplementary Fig. 12. Uncropped Western blot images.

Western blot images (uncropped) for Supplementary Fig. 6c

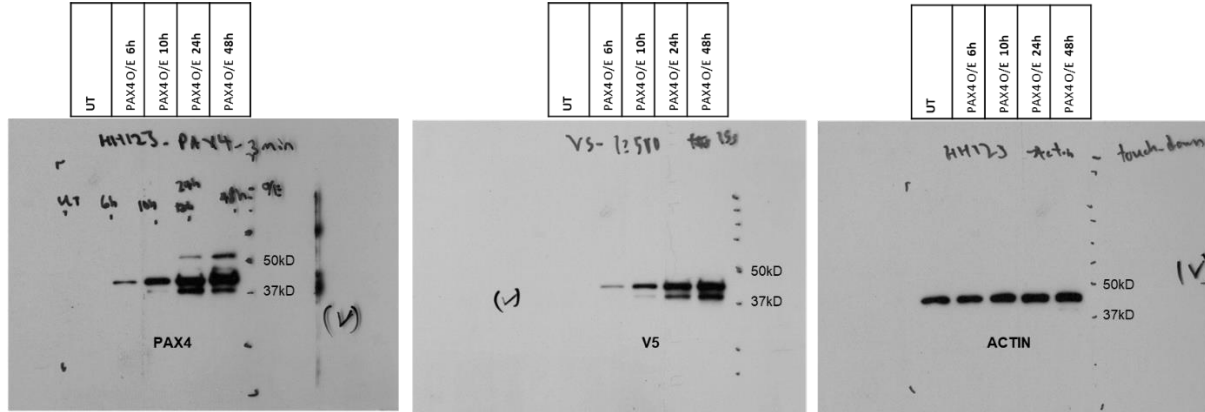

Western blot images (uncropped) for Supplementary Fig. 6f

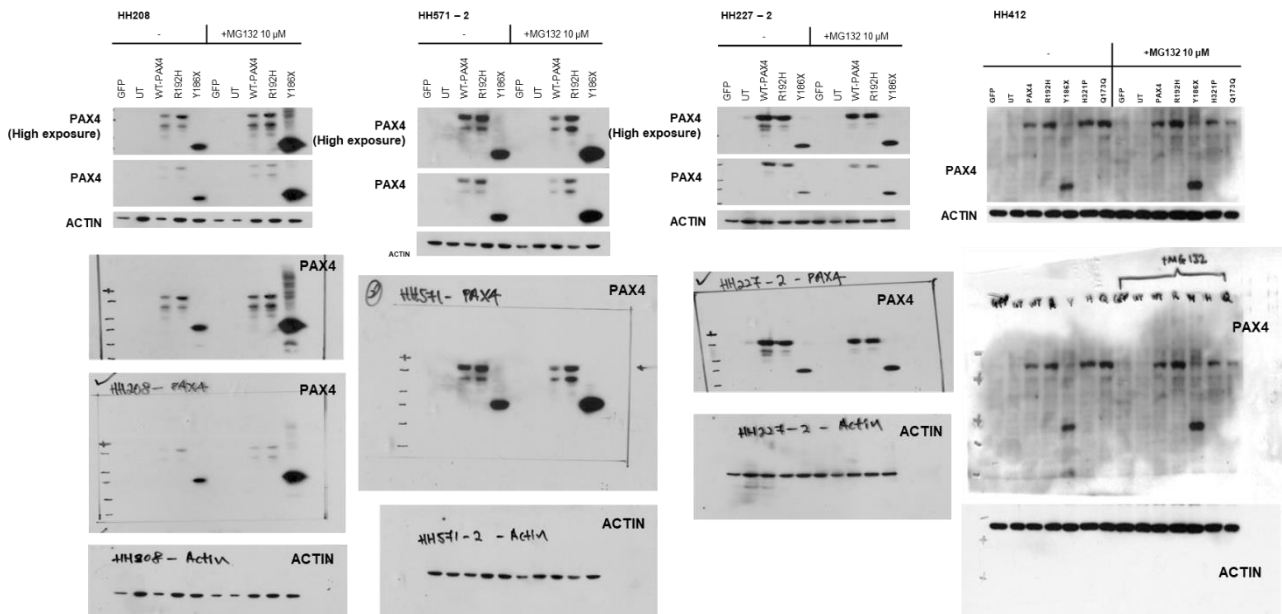



**Supplementary Fig. 13.** Gating strategy for all flow cytometry experiments presented in this paper.

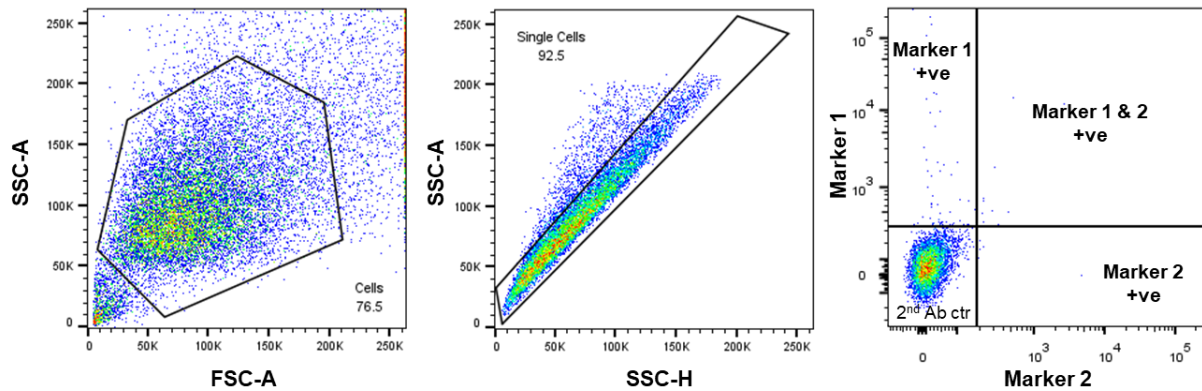

Cells were first gated on SSC-A/FSC-A, followed by gating for single cells by SSC-A/SSC-H. Cells were stained for markers of interest using primary antibodies. The percentage of positively stained cells were gated against secondary-antibody control (2<sup>o</sup> Ab ctr) staining.

**Supplementary Table 1a.** Gene based association analysis of *PAX4* variants with HbAc1 levels in 268,753 exomes from UKBioBank.

| <b>Variant Class</b> | <b>Number of Variants</b> | <b>P value SKAT-O</b> | <b>P Value Burden</b> | <b>P Value SKAT</b> | <b>CAF</b> |
|----------------------|---------------------------|-----------------------|-----------------------|---------------------|------------|
| pLOF                 | 20                        | 0.0421                | 0.0228                | 0.641               | 2.03e-4    |
| Missense             | 189                       | 0.00683               | 0.0159                | 0.00464             | 0.797      |
| Synonymous           | 73                        | 0.645                 | 0.472                 | 0.844               | 0.0757     |

CAF, cumulative allele frequency for this gene (sum of allele frequencies). Data retrieved from <https://app.genebass.org/> April 2022 (<https://doi.org/10.1016/j.xgen.2022.100168>).

**Supplementary Table 1b.** Gene based association analysis of *PAX4* variants with type 2 diabetes in 52,000 exomes from the type 2 diabetes knowledge portal.

| Test               | Mask                 | Number of Variants | Z score      | P value         | Odds Ratio | Standard Error | Sample Size |
|--------------------|----------------------|--------------------|--------------|-----------------|------------|----------------|-------------|
| SKAT               | LofTee               | 6                  | 146476.01    | 0.053           |            |                | 43,125      |
| Collapsing burden  |                      | 6                  | 1.70         | 0.088           | 1.21       | 0.111          | 43,125      |
| Variable threshold |                      | 6                  | 1.70         | 0.192           | 1.21       | 0.111          | 43,125      |
| SKAT-optimal       |                      | 6                  | 73238.00     | 0.078           |            |                | 43,125      |
| SKAT               | 16/16                | 6                  | 146476.01    | 0.053           |            |                | 43,125      |
| Collapsing burden  |                      | 6                  | 1.70         | 0.088           | 1.21       | 0.111          | 43,125      |
| Variable threshold |                      | 6                  | 1.70         | 0.192           | 1.21       | 0.111          | 43,125      |
| SKAT-optimal       |                      | 6                  | 73238.00     | 0.078           |            |                | 43,125      |
| SKAT               | 11/11                | 33                 | 1093741.78   |                 |            |                | 43,125      |
| Collapsing burden  |                      | 33                 | 1.4796       | 0.139           | 1.05       | 0.034          | 43,125      |
| Variable threshold |                      | 33                 | 2.658        | 0.040           | 1.12       | 0.043          | 43,125      |
| SKAT-optimal       |                      | 33                 | 546870.89    |                 |            |                | 43,125      |
| SKAT               | 5/5                  | 39                 | 24368973.87  | <b>0.00001</b>  |            |                | 43,125      |
| Collapsing burden  |                      | 39                 | 4.34         | <b>0.000014</b> | 1.06       | 0.013          | 43,125      |
| Variable threshold |                      | 39                 | 4.34         | <b>0.00013</b>  | 1.06       | 0.013          | 43,125      |
| SKAT-optimal       |                      | 39                 | 16026800.08  | <b>0.00002</b>  |            |                | 43,125      |
| SKAT               | 5/5+<br>LofTee<br>LC | 40                 | 24419808.29  | <b>0.00004</b>  |            |                | 43,125      |
| Collapsing burden  |                      | 40                 | 4.43         | <b>9.33e-6</b>  | 1.06       | 0.013          | 43,125      |
| Variable threshold |                      | 40                 | 4.43         | <b>0.00008</b>  | 1.06       | 0.013          | 43,125      |
| SKAT-optimal       |                      | 40                 | 16530425.89  | <b>0.00002</b>  |            |                | 43,125      |
| SKAT               | 5/5<br>+1/5<br>1%    | 77                 | 226078120.98 | <b>1.05e-31</b> |            |                | 43,125      |
| Collapsing burden  |                      | 77                 | 8.85         | <b>8.47e-19</b> | 1.06       | 0.007          | 43,125      |
| Variable threshold |                      | 77                 | 8.85         | <b>1.69e-17</b> | 1.06       | 0.007          | 43,125      |
| SKAT-optimal       |                      | 77                 | 126954564.88 | <b>9.26e-31</b> |            |                | 43,125      |
| SKAT               | 5/5 +<br>0/5 1%      | 92                 | 227251674.19 | <b>5.03e-31</b> |            |                | 43,125      |
| Collapsing burden  |                      | 92                 | 8.91         | <b>5.30e-19</b> | 1.06       | 0.007          | 43,125      |
| Variable threshold |                      | 92                 | 8.91         | <b>1.06e-17</b> | 1.06       | 0.007          | 43,125      |
| SKAT-optimal       |                      | 92                 | 129683675.78 | <b>2.90e-31</b> |            |                | 43,125      |

Data retrieved from <https://t2d.hugeamp.org> April 2022. Masks are described in Flannick et al Nature 2018.

**Supplementary Table 2. Summary of all hiPSC lines generated and used in this study.**

| <b>Origin</b> | <b>Genotype</b>                    | <b>Clone (SB lines)</b>                                  |
|---------------|------------------------------------|----------------------------------------------------------|
| SB_hiPSC      | PAX4-wt<br>Sham ctrl               | SB_Pax4 H1_B7<br>SB_Pax4 F3_H3<br>SB_Pax4 E6_E3          |
| SB_hiPSC      | PAX4-KO                            | SB_Pax4_KO B5_D3<br>SB_Pax4_KO D2_F3<br>SB_Pax4_KO F4_H5 |
| <b>Origin</b> | <b>Genotype</b>                    | <b>Clone (Patient hiPSCs) - R192H</b>                    |
| Donor 070     | p.Arg192Arg_wt                     | is070a<br>i070b                                          |
| Donor 173     | p.Arg192Arg_wt                     | i173b                                                    |
| Donor 039     | p.Arg192His                        | is039a<br>is039b                                         |
| Donor 040     | p.Arg192His                        | is040a<br>is040b                                         |
| Donor 043     | p.His192His                        | is043a<br>i043b                                          |
| Donor 181     | p.His192His                        | is181a<br>is181b<br>is181c                               |
| Donor II-7    | p.Tyr186X                          | iTSLa<br>iTSLb<br>iTSLc                                  |
| <b>Origin</b> | <b>Genotype</b>                    | <b>Clone (Patient hiPSCs) - Y186X</b>                    |
| iTSLa         | p.Tyr186X<br>CRISPR sham           | iTsla G3<br>iTsla B3                                     |
| iTSLa         | p.Tyr186Tyr_wt<br>CRISPR corrected | iTsla G12<br>iTsla C12<br>iTsla D9<br>iTsla G11          |
| <b>Origin</b> | <b>Genotype</b>                    | <b>Clone (Patient hiPSCs) - R192H</b>                    |
| 043a          | p.His192His<br>CRISPR sham         | E4<br>H11                                                |
| 043a          | p.Arg192Arg_wt<br>CRISPR corrected | B11<br>C12<br>E5<br>H9                                   |



**Supplementary Table 3. Reagents used for differentiation protocols.**

| <b>Reagent</b>                                | <b>Source, Catalog number</b>                    |
|-----------------------------------------------|--------------------------------------------------|
| MCDB 131 media                                | Corning, 15-100-CV; Gibco, 10372-019             |
| CMRL-1064 supplemented                        | Mediatech, 99-663-CV                             |
| Bovine serum albumin                          | Roche, 10775835001; Proliant, 68700              |
| Insulin-Transferrin-Selenium-Ethanolamine     | Gibco, 51500-056                                 |
| L-Ascorbic acid                               | Sigma-Aldrich, A4544 or A8960                    |
| Heparin                                       | Sigma-Aldrich, H3149                             |
| Human recombinant Activin A                   | Peprtech, 120-14; StemCell Technologies, 78001.2 |
| CHIR 99021                                    | Axon Medchem, 1386; Tocris, 4423                 |
| KGF/FGF-7                                     | Peprtech, 100-19; StemCell Technologies, 78046.2 |
| Retinoic acid                                 | Sigma-Aldrich, R2625; WAKO, 186-01114            |
| SANT1                                         | Sigma-Aldrich, S4572; Santa Cruz, sc-203253      |
| Phorbol 12,13-dibutyrate                      | Tocris, 4153                                     |
| LDN-193189                                    | Stemgent, 04-0074; Sigma-Aldrich, SML0559        |
| Compound E, $\gamma$ -secretase inhibitor XXI | EMD Millipore, 565789; Cayman, 15579-20          |
| Alk5 inhibitor II                             | ENZO, ALX-270-445-M001                           |
| L-3,3',5-triiodothyronine                     | Sigma-Aldrich, T6397; Merck Millipore, 642511    |
| Human betacellulin                            | Cell Signalling, 5235SF                          |
| Alpha-Amyloid Precursor Protein Modulator     | EMD Millipore, 565740                            |
| N-acetyl cysteine                             | Sigma-Aldrich, A9165                             |
| R428                                          | SelleckChem, S2841                               |
| Trolox                                        | EMD Millipore, 648471                            |
| Zinc Sulfate                                  | Sigma-Aldrich, Z0251                             |

**Supplementary Table 4. List of cloning primers used in this study.**

| <b>Cloning primers</b>          | <b>Primer sequence (5' – 3')</b>                              | <b>Purpose</b>                               |
|---------------------------------|---------------------------------------------------------------|----------------------------------------------|
| hPax4FLXbal1F                   | GCTCTAGAATGAACCAGCTTGGGG<br>GGCT                              | To clone full-length<br><i>PAX4</i> sequence |
| hPax4FLV5Xho1R                  | CCGCTCGAGTTCCAAGCCATACAG<br>TAGTGGG                           |                                              |
| <b>SDM primers</b>              | <b>Primer sequence (5' – 3')</b>                              | <b>Purpose</b>                               |
| Y186XSDM-F                      | GTGGGCAGTAGTCCTGATTCA                                         | To create Y186X                              |
| Y186XSDM-R                      | TGAATCAGGACTACTGCCAC                                          |                                              |
| R192HSMDM-F                     | CAGTGGCCCATGGAAAGCTG                                          | To create R192H                              |
| R192HSMDM-R                     | CAGCTTTCCATGGGCCACTG                                          |                                              |
| <b>Promoter cloning primers</b> | <b>Primer sequence (5' – 3')</b>                              | <b>Purpose</b>                               |
| hINSP-1.5KpnIF                  | GGGGGTACCGCCTGGCTCT                                           | <i>INS</i> gene promoter                     |
| hINSP-1EcoRVR                   | CCCGATATCGGCAGAAGGACA                                         |                                              |
| hGcgP-1068NheIF                 | CTAGCTAGCCACAGCTGGTCAATA<br>ACAGCAA                           | GCG gene promoter                            |
| hGcgP-1 HindIIIR                | CCCAAGCTTTTCTGCTGTCTTCTG<br>GTAGTGT                           |                                              |
| hARXPKpn-1084F                  | GGGGTACCAGGTGAACAGCCTCA<br>GGGTGAAG                           | <i>ARX</i> gene promoter                     |
| hARXPEcoRV-7R                   | GGGGATATCGGCTTTTTCCAGGG<br>CGCAGA                             |                                              |
| hSSTP-724FEcoRV                 | GGGGATATAGGGAGGGTGAGCCA<br>GAGGT                              | <i>SST</i> gene promoter                     |
| hSSTP-6RHindIII                 | TTTAAGCTTCGCCGCGAAAGCCGA<br>GC                                |                                              |
| <b>shRNA cloning primers</b>    | <b>Primer sequence (5' – 3')</b>                              |                                              |
| sh <i>PAX4</i> nt315F           | CGGCGGATCCTTAAGGTATCTAATCTCGAGATTAGATACC<br>TTAAGGATCCGTTTTTG |                                              |
| sh <i>PAX4</i> nt315R           | ATTCAAAAACGGATCCTTAAGGTATCTAATCTCGAGATTA<br>GATACCTTAAGGATCCG |                                              |

**Supplementary Table 5. List of qPCR primers used in this study.**

| <b>Targeting gene</b> | <b>Primer</b> | <b>Primer sequence (5' – 3')</b> |
|-----------------------|---------------|----------------------------------|
| <i>ACTIN</i>          | hActinF       | TTGCCGATCCGCCGCCCGTC             |
|                       | hActinR       | CCCATGCCACCATCACGCCCTGG          |
| <i>ARX</i>            | hArxF         | GGACGTCTTCACCAGGGAGGAAC          |
|                       | hArxR         | TCTCCCGCTTGCGCCACTT              |
| <i>GCG</i>            | hGcgF         | ACAGCACACTACCAGAAGACAGCA         |
|                       | hGcgR         | TGTGCCCTGTGAATGGCGCT             |
| <i>INS</i>            | hInsv1-3F2    | CCTGCAGGTGGGGCAGGTGGAGC          |
|                       | hInsv1-3R2    | CGGGTGTGGGGCTGCCTGCG             |
| <i>NKX6.1</i>         | hNkx6.1F      | ACGCACGCCTGGCCTGTACCCC           |
|                       | hNkx6.1R      | CCCTCTCGGGCCCCGCCAAGTA           |
| <i>PAX4</i>           | hPax4F5       | AGGACACGGTGAGGGTCTGGT            |
|                       | hPax4R5       | CAGTGGTTCCAGGGCAGGCA             |
| <i>PDX1</i>           | hPdx1F        | CCTTCCCGGAGGGAGCCGAGCC           |
|                       | hPdx1R        | GTAGGCCGTGCGCGTCCGCT             |
| <i>SST</i>            | hSstF         | GCTGCGCTGTCCATCGTCCT             |
|                       | hSstR         | TTGGCCAGTTCCTGCTTCCCC            |

**Supplementary Table 6. Antibodies used in this study.**

| <b>Antibody</b>                                                                      | <b>Dilution factor</b> | <b>Cat#</b>                    | <b>RRID</b> |
|--------------------------------------------------------------------------------------|------------------------|--------------------------------|-------------|
| <b>Primary antibody</b>                                                              |                        |                                |             |
| Anti-beta Actin (Mouse monoclonal)                                                   | WB 1:10000             | Sigma-Aldrich, A5441           | AB_476744   |
| Anti-C-PEPTIDE (Rat monoclonal)                                                      | IF 1:100               | DSHB, GN-ID4                   | AB_2255626  |
| Anti-CXCR4 PE-conjugated (Mouse monoclonal IgG <sup>2B</sup> Clone #44717)           | FC 1:10                | RnD, FAB173P                   | AB_357083   |
| Anti-CXCR4 APC-conjugated (Mouse Monoclonal (12G5)                                   | FC 1:25                | BD, 555976                     | AB_398616   |
| Anti-FLAG M2 (Mouse monoclonal)                                                      | WB 1:1000; IF 1:100    | Sigma-Aldrich, F1804           | AB_262044   |
| Anti-Glucagon Antibody (N-17) (Goat polyclonal)                                      | IF 1:100               | Santa cruz, sc-7780            | AB_641025   |
| Anti-Insulin antibody (Guinea pig polyclonal)                                        | IF 1:100; FC 1:100     | Abcam, ab7842                  | AB_306130   |
| Anti-PAX4 (Goat polyclonal)<br>*Not validated to stain endogenous protein expression | IF 1:100; WB 1:1000    | RnD, AF2614                    | AB_2159529  |
| Anti-SOX17 antibody (Goat polyclonal)                                                | FC 1:100               | RnD, AF1924                    | AB_355060   |
| Anti-SOX2 antibody (Rabbit polyclonal)                                               | IF 1:200               | Abcam, ab97959                 | AB_2341193  |
| Anti-Human SSEA-4 Antibody, Clone MC-813-70 (Mouse monoclonal)                       | IF 1:100               | StemCell Technologies, 60062AD | AB_528477   |
| Anti-Somatostatin Antibody (D-20) (Goat polyclonal)                                  | IF 1:100               | Santa cruz, sc-7819            | AB_2302603  |
| Anti-Human TRA-1-60 Antibody, Clone TRA-1-60R (Mouse monoclonal)                     | IF 1:100               | StemCell Technologies, 60064AD | AB_2686905  |
| Anti-V5 tag antibody (SV5-Pk1) (Mouse monoclonal)                                    | IF 1:100; WB 1:1000    | Abcam, ab27671                 | AB_471093   |
| FC block or anti-mouse CD16/CD32 (Rat monoclonal)                                    | FC 1:500               | BD, 553141                     | AB_394656   |
| Alexa Fluor® 488 anti-Human Sox17 (Mouse monoclonal Clone #P7-969)                   | FC 1:20                | BD, 562205                     | AB_10893402 |
| <b>Fluorophore-conjugated secondary antibody</b>                                     |                        |                                |             |
| Alexa Fluor® 488 anti-goat                                                           | IF 1:500; FC 1:2000    | Invitrogen, A11055             | AB_2534102  |
| Alexa Fluor® 488 anti-mouse                                                          | IF 1:500; FC 1:2000    | Invitrogen, A21202             | AB_141607   |

|                                          |                     |                       |                 |
|------------------------------------------|---------------------|-----------------------|-----------------|
| Alexa Fluor® 488 anti-rabbit             | IF 1:500; FC 1:2000 | Invitrogen, A21206    | AB_253579<br>2  |
| Alexa Fluor® 488 anti-rat                | IF 1:500; FC 1:2000 | Invitrogen, A21470    | AB_105615<br>19 |
| Alexa Fluor® 594 anti-goat               | IF 1:500; FC 1:2000 | Invitrogen, A11058    | AB_253410<br>5  |
| Alexa Fluor® 594 anti-Guinea pig         | IF 1:500; FC 1:2000 | Invitrogen, A11076    | AB_141930       |
| Alexa Fluor® 594 anti-mouse              | IF 1:500; FC 1:2000 | Invitrogen, A21203    | AB_141633       |
| Alexa Fluor® 594 anti-rabbit             | IF 1:500; FC 1:2000 | Invitrogen, A21207    | AB_141637       |
| Alexa Fluor® 647 anti-Guinea pig         | IF 1:500; FC 1:2000 | Jackson, 706-605-148  | AB_234047<br>6  |
| Alexa Fluor® 647 anti-mouse              | IF 1:500; FC 1:2000 | Jackson, A31571       | AB_162542       |
| Alexa Fluor® 647 anti-rabbit             | IF 1:500; FC 1:2000 | Invitrogen, A31573    | AB_253618<br>3  |
| Alexa Fluor® 488 Isotype                 | IF 1:500; FC 1:2000 | BD Pharmingen, 565572 | AB_286968<br>5  |
| <b>HRP-conjugated secondary antibody</b> |                     |                       |                 |
| Donkey anti-goat IgG-HRP                 | WB 1:10000          | Santa cruz, sc-2020   | AB_631728       |
| Mouse anti-goat IgG-HRP                  | WB 1:5000           | Santa cruz, sc-2354   | AB_628490       |
| Goat anti rabbit IgG HRP                 | WB 1:10000          | Santa cruz, sc-2004   | AB_631746       |
| Goat anti-mouse IgG-HRP                  | WB 1:10000          | Santa cruz, sc-2005   | AB_631736       |
| Goat anti-mouse IgG-HRP                  | WB 1:10000          | Santa cruz, sc-2055   | AB_631738       |
| m-IgGk BP-HRP                            | WB 1:5000           | Santa cruz, sc-516102 | AB_2687626      |
| Mouse anti-rabbit IgG-HRP                | WB 1:5000           | Santa cruz, sc-2357   | AB_628497       |

WB: Western blot; IF: Immunofluorescence; FC: Flow cytometry.
