# Supplementary material for: PAX4 loss of function increases diabetes risk by altering human pancreatic endocrine cell development
Source: PubMed Central journal article supplement (PMC10542369; doi:10.1038/s41467-023-41860-z), 2023-09-30
Supplement: 41467_2023_41860_MOESM3_ESM.pdf [file 41467_2023_41860_MOESM3_ESM.pdf]

## Description of Additional Supplementary Files

### **Supplementary Data. 1**

Description: RNA-seq SB hiPSCs Protocol A

### **Supplementary Data. 2**

Description: RNA-seq SB hiPSCs Protocol B

### **Supplementary Data. 3**

Description: RNA-seq Donor hiPSCs Protocol B

### **Supplementary Data. 4**

Description: RNA-seq Engineered H192H Protocol B

### **Supplementary Data. 5**

Description: RNA-seq Engineered Y186X Protocol B
